# Supplementary material
Source: Springer Nature journal article supplement (https://www.springermedizin.de/resource/supplementary/12877_2011_698_MOESM1_ESM.pdf/9440016)

Age 68 years

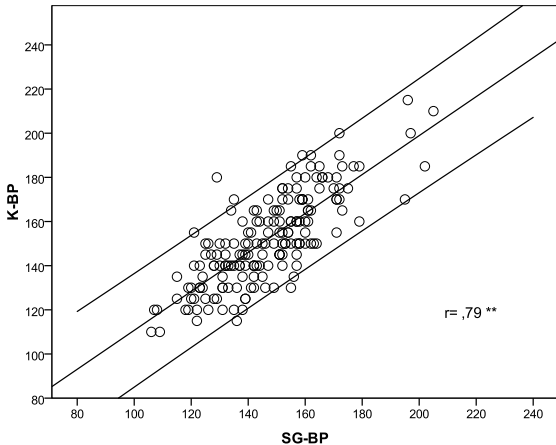

Age 81 years

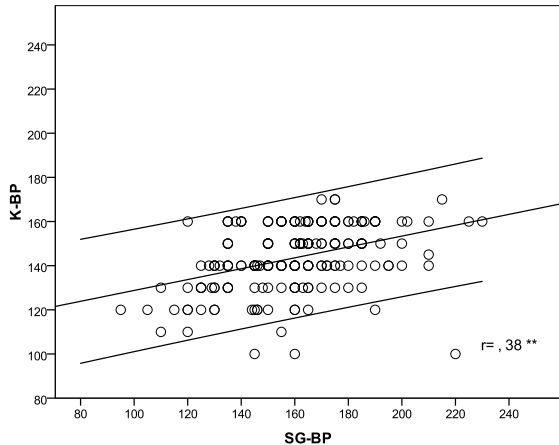

Supplement: MOESM1 [file 9440016]
